# Supplementary material
Source: MDPI journal article supplement (https://www.mdpi.com/2073-4344/12/11/1396)
Supplement: s1 [file s1]

## Supplementary Information.

# Improving Catalytic Activity towards the Direct Synthesis of H<sub>2</sub>O<sub>2</sub> through Cu Incorporation into AuPd Catalysts

Alexandra Barnes <sup>1,†</sup>, Richard J. Lewis <sup>1\*,†</sup>, David J. Morgan <sup>1,2</sup>, Thomas E. Davies <sup>1</sup> and Graham J. Hutchings <sup>1,\*</sup>

<sup>1</sup> Max Planck-Cardiff Centre on the Fundamentals of Heterogeneous Catalysis FUNCAT, Cardiff Catalysis Institute, School of Chemistry, Cardiff University, Main Building, Park Place, Cardiff CF10 3AT, UK

<sup>2</sup> Harwell XPS, Research Complex at Harwell (RCaH) Didcot OX11 0FA, UK

\* Correspondence: lewisr27@cardiff.ac.uk (R.J.L.); hutch@cardiff.ac.uk (G.J.H.)

† These authors contributed equally to this work.

**Table S1.** Synthesis details of the precursors used in the preparation of key bi- and tri-metallic 1%AuPd/ZSM-5 catalysts.

| Catalyst                                                | Au precursor                          | Precursor vol. /<br>$\mu\text{L (mgmL}^{-1}\text{)}$ | Au precursor      | Precursor vol. /<br>$\mu\text{L (mgmL}^{-1}\text{)}$ | Tertiary metal<br>precursor                          | Precursor vol. /<br>$\mu\text{L (mgmL}^{-1}\text{)}$ |
|---------------------------------------------------------|---------------------------------------|------------------------------------------------------|-------------------|------------------------------------------------------|------------------------------------------------------|------------------------------------------------------|
| 1%AuPd <sub>(1.00)</sub> /ZSM-5                         | HAuCl <sub>4</sub> .3H <sub>2</sub> O | 530 (12.25)                                          | PdCl <sub>2</sub> | 585 (6.00)                                           | -                                                    | -                                                    |
| 1%AuPd <sub>(0.0975)</sub> Cu <sub>(0.025)</sub> /ZSM-5 | HAuCl <sub>4</sub> .3H <sub>2</sub> O | 517 (12.25)                                          | PdCl <sub>2</sub> | 570 (6.00)                                           | CuCl <sub>2</sub>                                    | 106 (2.36)                                           |
| 1%AuPd <sub>(0.0975)</sub> Zn <sub>(0.025)</sub> /ZSM-5 | HAuCl <sub>4</sub> .3H <sub>2</sub> O | 517 (12.25)                                          | PdCl <sub>2</sub> | 570 (6.00)                                           | Zn(NO <sub>3</sub> ) <sub>2</sub> .6H <sub>2</sub> O | 46 (5.43)                                            |
| 1%AuPd <sub>(0.0975)</sub> Ni <sub>(0.025)</sub> /ZSM-5 | HAuCl <sub>4</sub> .3H <sub>2</sub> O | 517 (12.25)                                          | PdCl <sub>2</sub> | 570 (6.00)                                           | Ni(NO <sub>3</sub> ) <sub>2</sub>                    | 115 (2.18)                                           |

**Note 1 :** In the case of the tri-metallic catalysts the combined loading of Au and Pd is 0.975 wt.% (Au: Pd = (1:1 mol/mol)) and that of the tertiary metal (Cu, Zn or Ni) is 0.025 wt.%. In all cases catalyst are exposed to a reductive heat treatment prior to use (5%H<sub>2</sub>/Ar, 400 °C, 4 h, 10°Cmin<sup>-1</sup>). **Note 2:** values in parentheses for catalyst nomenclature refer to metal loading of (Au+Pd) or tertiary metal. In all instances total metal loading is 1 wt.% and Au: Pd: X = 1: 1 (mol/mol).

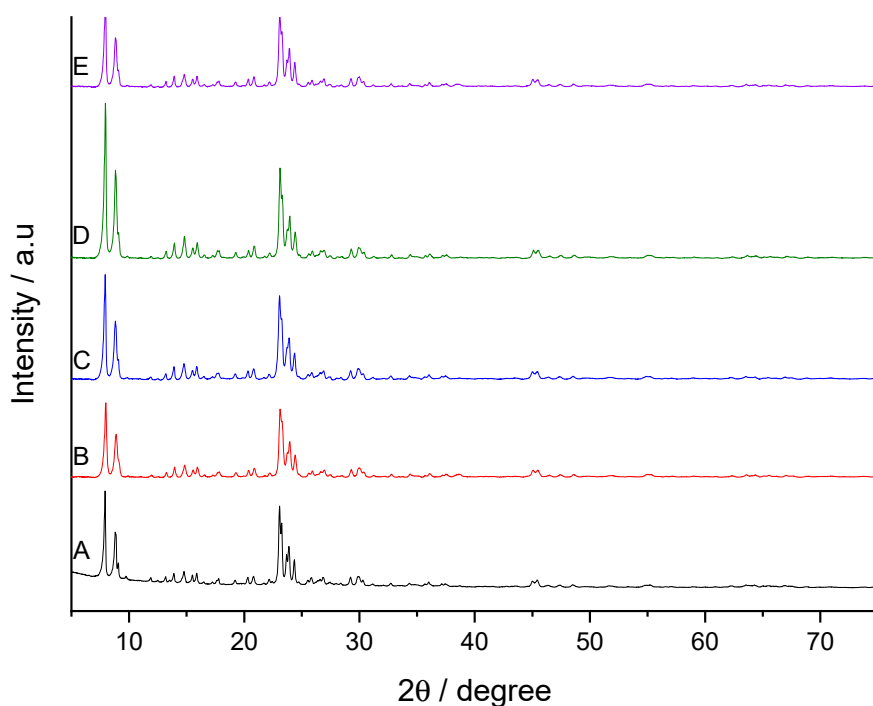

**Figure S1.** X-ray diffractograms of 1%AuPd<sub>(0.0975)</sub>X<sub>(0.025)</sub>/ZSM-5 catalysts. **(A)** ZSM-5, **(B)** 1%AuPd<sub>(1.00)</sub>/ZSM-5, **(C)** 1%AuPd<sub>(0.0975)</sub>Cu<sub>(0.025)</sub>/ZSM-5, **(D)** 1%AuPd<sub>(0.0975)</sub>Ni<sub>(0.025)</sub>/ZSM-5 and **(E)** 1%AuPd<sub>(0.0975)</sub>Zn<sub>(0.025)</sub>/ZSM-5.

**Supplementary text associated with Figure S1.**

No significant change in the MFI structure of the ZSM-5 support is observed upon metal impregnation and exposure to a reductive heat treatment (flowing 5% H<sub>2</sub>/Ar, 400 °C, 4h, 10°Cmin<sup>-1</sup>), based on the main reflections associated with ZSM-5 ( $\theta = 7.8, 8.8, 14.8, 23.14, 23.91$  and  $24.5^\circ$ ).

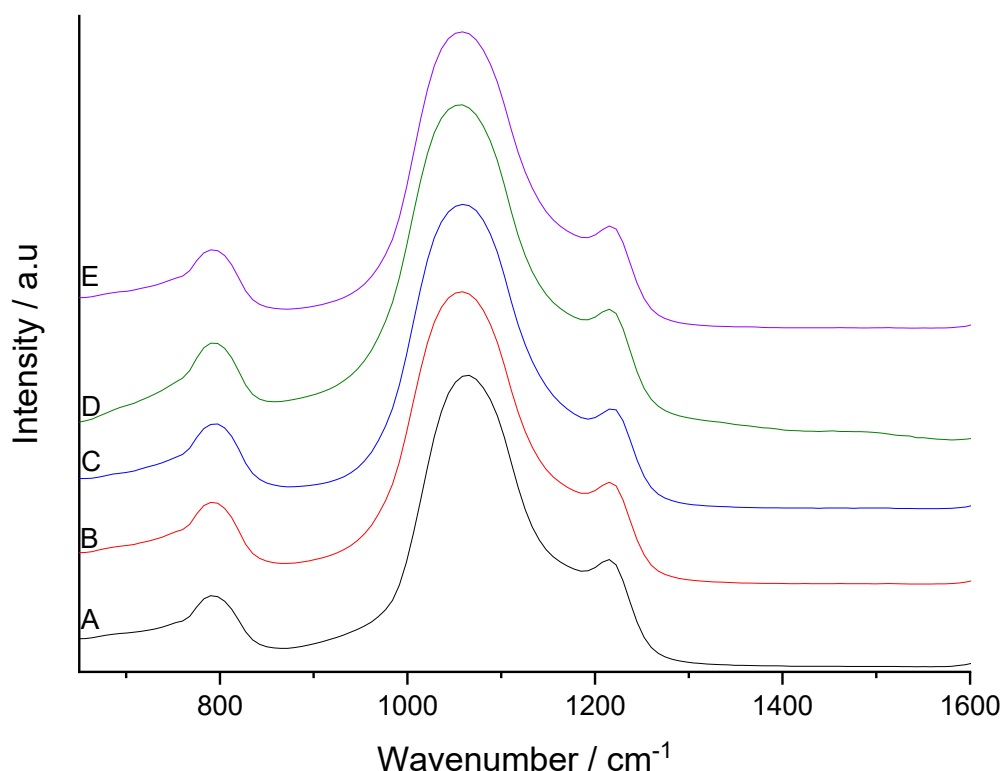

**Figure S2.** Fourier-transform infrared spectroscopy of 1%AuPd<sub>(0.975)</sub>X<sub>(0.025)</sub>/ZSM-5 catalysts. **(A)** ZSM-5, **(B)** 1%AuPd<sub>(1.00)</sub>/ZSM-5, **(C)** 1%AuPd<sub>(0.975)</sub>Cu<sub>(0.025)</sub>/ZSM-5, **(D)** 1%AuPd<sub>(0.975)</sub>Ni<sub>(0.025)</sub>/ZSM-5 and **(E)** 1%AuPd<sub>(0.975)</sub>Zn<sub>(0.025)</sub>/ZSM-5.

#### Supplementary text associated with Figure S2.

As with analysis via XRD (Figure S.1), investigation of the 1%AuPd<sub>(0.975)</sub>X<sub>(0.025)</sub>/ZSM-5 catalysts by FTIR indicates no significant changes in the structure of the ZSM-5 structure is observed after metal impregnation and exposure to a reductive heat treatment (flowing 5% H<sub>2</sub>/Ar, 400 °C, 4h, 10°Cmin<sup>-1</sup>). It is possible to observe three distinct infrared bands in the FTIR spectra of 1%AuPd<sub>(0.975)</sub>X<sub>(0.025)</sub>/ZSM-5 catalysts at 800, 1060 and 1220 cm<sup>-1</sup> characteristic of SiO<sub>4</sub> tetrahedron units. The adsorption band around 1060 cm<sup>-1</sup> is attributed to the internal asymmetric stretching vibration of Si-O linkage. While the adsorption band at 1220 cm<sup>-1</sup> have been assigned to the 5-membered rings present in the structure of the ZSM-5 zeolite and the band at 800 cm<sup>-1</sup> can be assigned the symmetric stretching of the external linkages of the SiO<sub>4</sub> tetrahedron.

**Table S2.** Summary of porosity and surface area of key 1%AuPd<sub>(0.0975)</sub>X<sub>(0.025)</sub>/ZSM-5 catalysts and HZSM-5(30).

| Catalyst                                               | Surface area / m <sup>2</sup> g <sup>-1</sup> | V <sub>Micropore</sub> / cm <sup>3</sup> g <sup>-1</sup> |
|--------------------------------------------------------|-----------------------------------------------|----------------------------------------------------------|
| ZSM-5(30)                                              | 493                                           | 0.185                                                    |
| 1%AuPd <sub>(1.00)</sub> /ZSM-5                        | 446                                           | 0.170                                                    |
| 1%AuPd <sub>(0.975)</sub> Cu <sub>(0.025)</sub> /ZSM-5 | 440                                           | 0.171                                                    |

**Note:** ZSM-5 support exposed to calcination prior to metal immobilisation (flowing air, 550 °C, 3 h, 20 °Cmin<sup>-1</sup>)

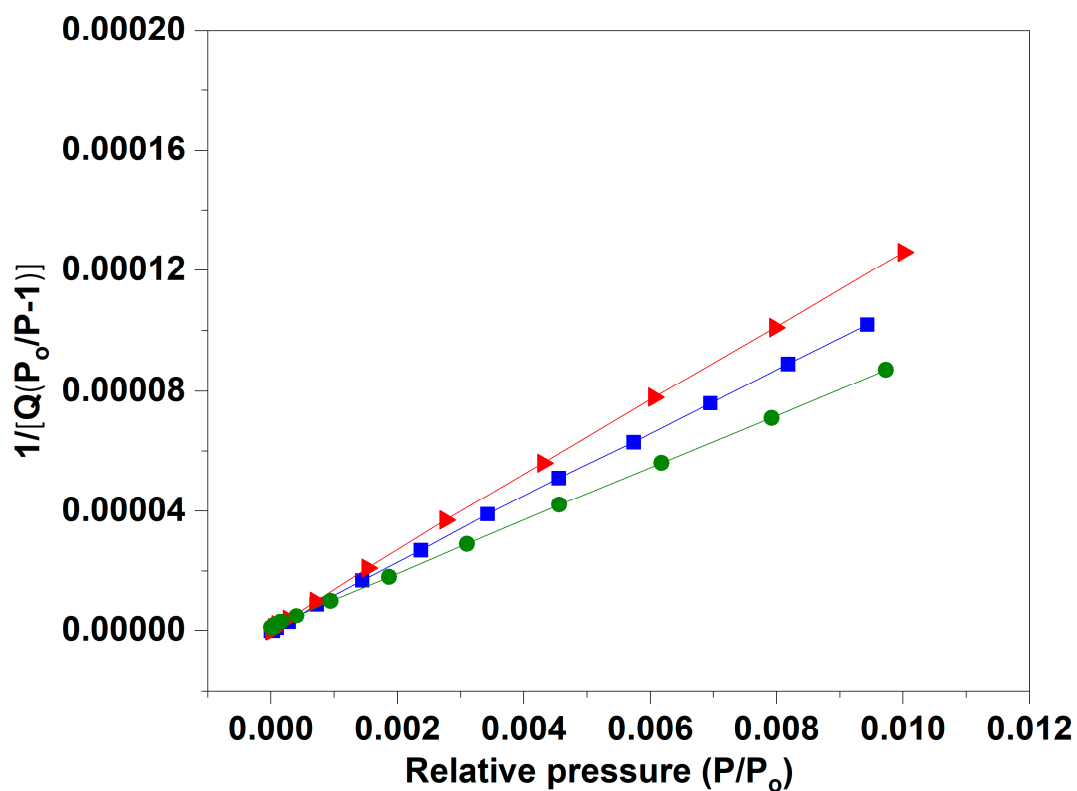

**Figure S3.** BET analysis plots for key 1%AuPd<sub>(0.0975)</sub>X<sub>(0.025)</sub>/ZSM-5 catalysts and HZSM-5(30). **Key:** ZSM-5(30) (red triangles), 1%AuPd<sub>(1.00)</sub>/ZSM-5 (blue squares), 1%AuPd<sub>(0.975)</sub>Cu<sub>(0.025)</sub>/ZSM-5 (green circles). **Note:** ZSM-5 support exposed to calcination prior to metal immobilisation (flowing air, 550 °C, 3 h, 20 °Cmin<sup>-1</sup>)

**Table S3.** Comparison of initial H<sub>2</sub>O<sub>2</sub> synthesis rates over 1%AuPd<sub>(0.0975)</sub>X<sub>(0.025)</sub>/ZSM-5 (X=Cu, Ni, Zn) catalysts, as a function of Cu loading.

| Catalyst                                               | Productivity /<br>mol <sub>H<sub>2</sub>O<sub>2</sub></sub> kg <sub>cat</sub> <sup>-1</sup> h <sup>-1</sup> | H <sub>2</sub> O <sub>2</sub> Conc. /<br>wt. % | Initial rate of<br>reaction /<br>mmol <sub>H<sub>2</sub>O<sub>2</sub></sub> mmol <sub>metal</sub> <sup>-1</sup> min <sup>-1</sup> | Degradation<br>/<br>mol <sub>H<sub>2</sub>O<sub>2</sub></sub> kg <sub>cat</sub> <sup>-1</sup> h <sup>-1</sup> |
|--------------------------------------------------------|-------------------------------------------------------------------------------------------------------------|------------------------------------------------|-----------------------------------------------------------------------------------------------------------------------------------|---------------------------------------------------------------------------------------------------------------|
| ZSM-5(30)                                              | 0                                                                                                           | 0                                              | 0                                                                                                                                 | 0                                                                                                             |
| 1%AuPd <sub>(1.00)</sub> /ZSM-5                        | 69                                                                                                          | 0.14                                           | 37.6                                                                                                                              | 320                                                                                                           |
| 1%AuPd <sub>(0.975)</sub> Cu <sub>(0.025)</sub> /ZSM-5 | 115                                                                                                         | 0.23                                           | 48.5                                                                                                                              | 529                                                                                                           |
| 1%AuPd <sub>(0.975)</sub> Ni <sub>(0.025)</sub> /ZSM-5 | 81                                                                                                          | 0.16                                           | 36.4                                                                                                                              | 281                                                                                                           |
| 1%AuPd <sub>(0.975)</sub> Zn <sub>(0.025)</sub> /ZSM-5 | 77                                                                                                          | 0.16                                           | 39.6                                                                                                                              | 361                                                                                                           |

**H<sub>2</sub>O<sub>2</sub> direct synthesis reaction conditions:** Catalyst (0.01 g), H<sub>2</sub>O (2.9 g), MeOH (5.6 g), 5% H<sub>2</sub>/CO<sub>2</sub> (420 psi), 25% O<sub>2</sub>/CO<sub>2</sub> (160 psi), 0.5 h, 2° C, 1200 rpm. **Note 1:** Initial reaction rates are determined after a reaction time of 0.083 h and are calculated based on theoretical metal loading. **Note 2:** ZSM-5 support exposed to calcination prior to metal immobilisation (flowing air, 550 °C, 3 h, 20 °Cmin<sup>-1</sup>)

**Table S4.** The effect of tertiary metal introduction upon the surface atomic composition of 1%AuPd<sub>(0.975)</sub>X<sub>(0.025)</sub>/ZSM-5 catalysts (X= Cu, Ni, Zn) , as determined by XPS.

| Catalyst                                               | Au: Pd | Pd <sup>2+</sup> : Pd <sup>0</sup> | Productivity /<br>mol <sub>H<sub>2</sub>O<sub>2</sub></sub> kg <sub>cat</sub> <sup>-1</sup> h <sup>-1</sup> |
|--------------------------------------------------------|--------|------------------------------------|-------------------------------------------------------------------------------------------------------------|
| 1%AuPd <sub>(1.00)</sub> /ZSM-5                        | 0.78   | 0.30                               | 69                                                                                                          |
| 1%AuPd <sub>(0.975)</sub> Cu <sub>(0.025)</sub> /ZSM-5 | 0.81   | 1.06                               | 115                                                                                                         |
| 1%AuPd <sub>(0.975)</sub> Ni <sub>(0.025)</sub> /ZSM-5 | 0.83   | 2.13                               | 81                                                                                                          |
| 1%AuPd <sub>(0.975)</sub> Zn <sub>(0.025)</sub> /ZSM-5 | 0.28   | 1.13                               | 77                                                                                                          |

**H<sub>2</sub>O<sub>2</sub> direct synthesis reaction conditions:** Catalyst (0.01 g), H<sub>2</sub>O (2.9 g), MeOH (5.6 g), 5% H<sub>2</sub>/CO<sub>2</sub> (420 psi), 25% O<sub>2</sub>/CO<sub>2</sub> (160 psi), 0.5 h, 2° C, 1200 rpm.

**Table S5.** Comparison of initial H<sub>2</sub>O<sub>2</sub> synthesis rates over 1%AuPdCu/ZSM-5 catalysts, as a function of Cu loading.

| Catalyst                                               | Productivity /<br>mol <sub>H<sub>2</sub>O<sub>2</sub></sub> kg <sub>cat</sub> <sup>-1</sup> h <sup>-1</sup> | H <sub>2</sub> O <sub>2</sub> Conc. /<br>wt. % | Initial rate of reaction /<br>mmol <sub>H<sub>2</sub>O<sub>2</sub></sub> mmol <sub>metal</sub> <sup>-1</sup> min <sup>-1</sup> |
|--------------------------------------------------------|-------------------------------------------------------------------------------------------------------------|------------------------------------------------|--------------------------------------------------------------------------------------------------------------------------------|
| 1%AuPd/ZSM-5                                           | 69                                                                                                          | 0.14                                           | 37.6                                                                                                                           |
| 1%AuPd <sub>(0.988)</sub> Cu <sub>(0.012)</sub> /ZSM-5 | 111                                                                                                         | 0.22                                           | 45.1                                                                                                                           |
| 1%AuPd <sub>(0.981)</sub> Cu <sub>(0.019)</sub> /ZSM-5 | 116                                                                                                         | 0.23                                           | 45.7                                                                                                                           |
| 1%AuPd <sub>(0.975)</sub> Cu <sub>(0.025)</sub> /ZSM-5 | 115                                                                                                         | 0.23                                           | 48.5                                                                                                                           |
| 1%AuPd <sub>(0.963)</sub> Cu <sub>(0.037)</sub> /ZSM-5 | 75                                                                                                          | 0.15                                           | 29.7                                                                                                                           |

**H<sub>2</sub>O<sub>2</sub> direct synthesis reaction conditions:** Catalyst (0.01 g), H<sub>2</sub>O (2.9 g), MeOH (5.6 g), 5% H<sub>2</sub>/CO<sub>2</sub> (420 psi), 25% O<sub>2</sub>/CO<sub>2</sub> (160 psi), 0.5 h, 2° C, 1200 rpm. **Note:** Initial reaction rates are determined after a reaction time of 0.083 h and are calculated based on theoretical metal loading.

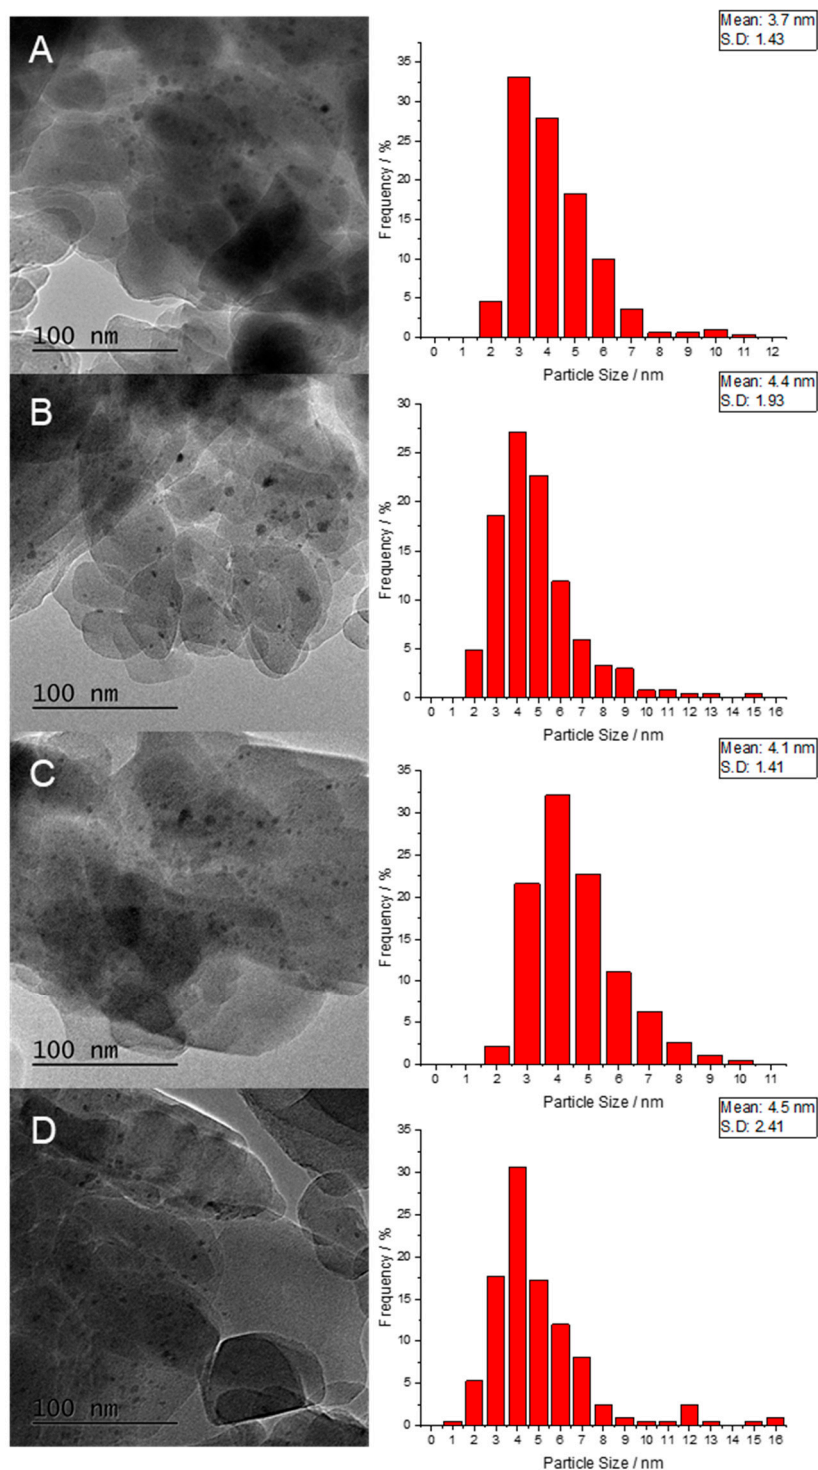

**Figure S4.** Representative bright field transmission electron micrographs and corresponding particle size histograms of as-prepared (A) 1% $\text{AuPd}_{(1.00)}/\text{ZSM-5}$  and (C) 1% $\text{AuPd}_{(0.975)}\text{Cu}_{(0.025)}/\text{ZSM-5}$  catalysts and analogous (B) 1% $\text{AuPd}_{(1.00)}/\text{ZSM-5}$  and (D) 1% $\text{AuPd}_{(0.975)}\text{Cu}_{(0.025)}/\text{ZSM-5}$  samples after use in the direct synthesis reaction.  **$\text{H}_2\text{O}_2$  direct synthesis reaction conditions:** Catalyst (0.01 g),  $\text{H}_2\text{O}$  (2.9 g), MeOH (5.6 g), 5%  $\text{H}_2/\text{CO}_2$  (420 psi), 25%  $\text{O}_2/\text{CO}_2$  (160 psi), 0.5 h, 2° C, 1200 rpm.

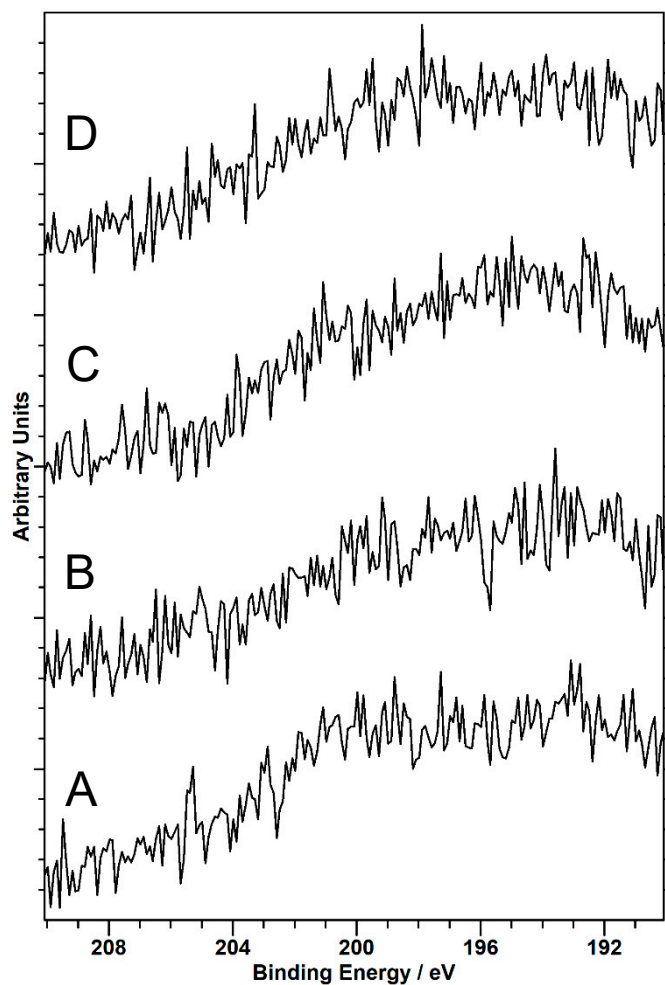

**Figure S5.** Comparison of surface atomic Cl content of the as-prepared **(A)** and **(B)** used 1% $\text{AuPd}_{(1.00)}$ /ZSM-5 catalyst and the fresh **(C)** and **(D)** used 1% $\text{AuPd}_{(0.975)}\text{Cu}_{(0.025)}$ /ZSM-5 analogue. **Note:** No signal is observed for any catalyst formulation within the expected energy window for Cl(2p) (approx. 200 eV).



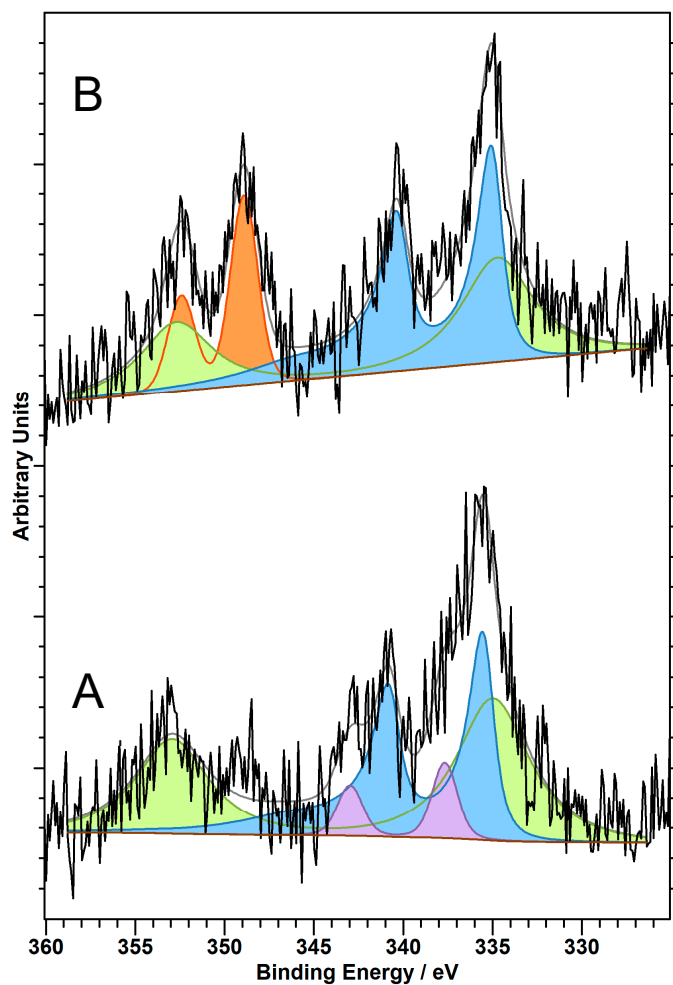

**Figure S6.** XPS spectra of Pd(3d) regions for the (A) as-prepared and (B) used 1%AuPd<sub>(1.00)</sub>/ZSM-5 catalyst, after use in the H<sub>2</sub>O<sub>2</sub> direct synthesis reaction. **Key:** Au(4d) (green), Pd<sup>0</sup>(blue), Pd<sup>2+</sup>(purple), Ca<sup>2+</sup> (orange).

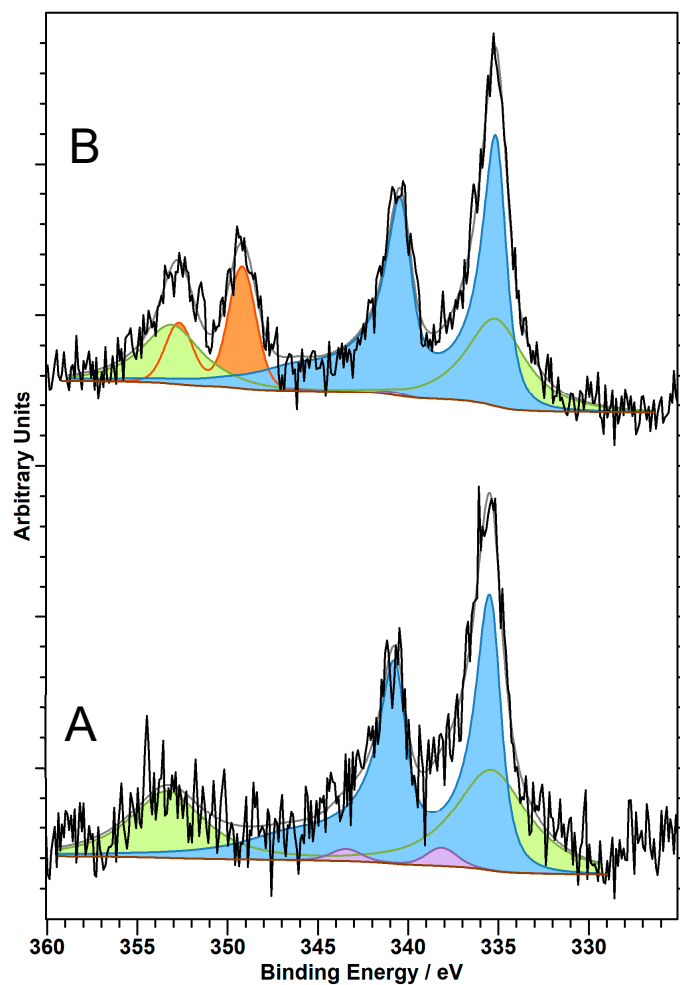

**Figure S7.** XPS spectra of Pd(3d) regions for the **(A)** as-prepared and **(B)** used 1% $\text{AuPd}_{(0.975)}\text{Cu}_{(0.025)}$ /ZSM-5 catalyst, after use in the  $\text{H}_2\text{O}_2$  direct synthesis reaction. **Key:** Au(4d) (green),  $\text{Pd}^0$  (blue),  $\text{Pd}^{2+}$  (purple),  $\text{Ca}^{2+}$  (orange).
